# Supplementary material
Source: HighWire-hosted journal article supplement (http://cmajopen.ca/highwire/filestream/81366/field_highwire_adjunct_files/1/2020-0030-2-at.pdf)
Supplement: 2020-0030-2-at.pdf [file 2020-0030-2-at.pdf]

**Appendix 2 (as supplied by the authors)**

## Questionnaire auto-administré sur l'évaluation du potentiel de mise à l'échelle

### 1. Introduction

**Merci d'avoir accepté de participer à cette évaluation de votre innovation.**

**Il s'agit d'une collecte de données qui s'inscrit dans le cadre d'un projet de recherche en appui au Symposium sur les innovations du Collège québécois des médecins de famille. Ce projet de recherche contribuera à valoriser scientifiquement l'ensemble des innovations. De plus, il sera possible pour chacun des innovateurs de recevoir une rétroaction personnalisée sur son innovation en cours d'expérimentation ou de développement ; des objectifs à atteindre en vue d'une future mise à l'échelle y seront proposés.**

**Remplir le formulaire transmis fera foi de votre consentement au projet de recherche. Merci de remplir le formulaire pour chacune de vos innovations. Si vous avez plus d'une innovation, vous pouvez utiliser le même hyperlien.**

## Questionnaire auto-administré sur l'évaluation du potentiel de mise à l'échelle

### 2. Renseignement généraux

\* 1. Quel est le nom de l'innovation ?

2. Quelle est l'abréviation du titre de l'innovation ?

3. Quel est le type d'innovation ?

- |                                                  |                                  |
|--------------------------------------------------|----------------------------------|
| <input type="radio"/> Programme                  | <input type="radio"/> Indicateur |
| <input type="radio"/> Modèle                     | <input type="radio"/> Algorithme |
| <input type="radio"/> Approche                   | <input type="radio"/> Service    |
| <input type="radio"/> Outil                      | <input type="radio"/> Politique  |
| <input type="radio"/> Instrument                 | <input type="radio"/> Pratique   |
| <input type="radio"/> Autres (veuillez préciser) |                                  |

\* 4. Quel est le but de l'innovation ?

Questionnaire auto-administré sur l'évaluation du potentiel de mise à l'échelle

3. Évaluation de la dimension « Théorie »

\* 5. Une théorie ou un modèle conceptuel a-t-il éclairé l'élaboration de l'innovation ?

- Oui  Non prévue
- Non  Sans objet
- En cours d'évaluation

Commentaire

Questionnaire auto-administré sur l'évaluation du potentiel de mise à l'échelle

4. Évaluation de la dimension « Impact »

\* 6. Disposez-vous de données portant sur l'acceptabilité de l'innovation ?

*On entend par acceptabilité, la perception qu'ont les parties prenantes sur le fait que l'innovation est agréable, acceptable ou satisfaisante, et qu'elle permet d'améliorer l'expérience des services généraux.*

- Oui  Non prévue  
 Non  Sans objet  
 En cours d'évaluation

Commentaire

\* 7. Disposez-vous de données portant sur la faisabilité de l'innovation ?

*On entend par faisabilité, la mesure selon laquelle l'innovation est compatible, pertinente et applicable dans un contexte ou un milieu donné.*

- Oui  Non prévue  
 Non  Sans objet  
 En cours d'évaluation

Commentaire

\* 8. Disposez-vous de données portant sur l'adaptabilité de l'innovation ?

*On entend par adaptabilité, la mesure selon laquelle l'innovation intègre les valeurs et croyances de la population cible.*

- Oui  Non prévue  
 Non  Sans objet  
 En cours d'évaluation

Commentaire

\* 9. Disposez-vous de données portant sur l'efficacité potentielle de l'innovation (c'est-à-dire, testée dans des conditions expérimentales) ?

Oui

Non prévue

Non

Sans objet

En cours d'évaluation

Commentaire

\* 10. Disposez-vous de données portant sur l'efficacité de l'innovation en contexte réel (c'est-à-dire, testée dans des conditions du monde réel) ?

Oui

Non prévue

Non

Sans objet

En cours d'évaluation

Commentaire

\* 11. Les résultats des évaluations de l'innovation ont-ils été documentés ?

Oui

Non prévue

Non

Sans objet

En cours d'évaluation

Commentaire



Questionnaire auto-administré sur l'évaluation du potentiel de mise à l'échelle

5. Évaluation de la dimension « Couverture »

\* 12. Disposez-vous de données sur la portée de l'innovation (numérateur et dénominateur) ?

*On entend par portée, la proportion (numérateur et dénominateur) de la population cible expérimentant l'innovation. Le numérateur reflète le nombre d'unités individuelles ayant reçu l'innovation et le dénominateur, le nombre total d'unités individuelles ciblées.*

- Oui  Non prévue
- Non  Sans objet
- En cours d'évaluation

Commentaire

\* 13. Disposez-vous de données sur l'adoption de l'innovation (numérateur et dénominateur) ?

*On entend par adoption, la proportion (numérateur et dénominateur) de contextes ou milieux qui adopteront l'innovation. Le numérateur reflète le nombre d'unités organisationnelles ayant reçu l'innovation et le dénominateur, le nombre total d'unités organisationnelles ciblées.*

- Oui  Non prévue  
 Non  Sans objet  
 En cours d'évaluation

Commentaire

\* 14. Disposez-vous de données sur la fidélité de la mise en œuvre et l'utilisation de l'innovation ?

*On entend par fidélité, la mesure selon laquelle l'innovation est mise en œuvre et utilisée comme prévu.*

- Oui  Non prévue  
 Non  Sans objet  
 En cours d'évaluation

Commentaire

\* 15. Disposez-vous de données sur la pérennisation de l'innovation ? Si oui, quelle sera la durée ? (veuillez préciser).

*On entend par pérennisation, la mesure selon laquelle l'innovation est soutenue au fil du temps.*

Oui

Non prévue

Non

Sans objet

En cours d'évaluation

Commentaire

Questionnaire auto-administré sur l'évaluation du potentiel de mise à l'échelle

6. Évaluation de la dimension « Contexte »

\* 16. Avez-vous mis en œuvre l'innovation dans un contexte (p. ex., au niveau individuel, de la communauté, culturel, politique, du personnel ou de l'organisation) comparable au nouveau contexte dans lequel elle sera mise à l'échelle ?

- Oui
- Non
- En cours d'évaluation
- Non prévue
- Sans objet

Commentaire

\* 17. Avez-vous évalué si l'innovation est compatible avec des interventions similaires dans le même contexte ?

- Oui  Non prévue  
 Non  Sans objet  
 En cours d'évaluation

Commentaire

\* 18. Avez-vous déterminé si l'innovation est conforme aux directives en matière de politique du contexte dans lequel elle sera mise à l'échelle ?

- Oui  Non prévue  
 Non  Sans objet  
 En cours d'évaluation

Commentaire

Questionnaire auto-administré sur l'évaluation du potentiel de mise à l'échelle

7. Évaluation de la dimension « Coût »

\* 19. Disposez-vous de données sur le rapport coûts-efficacité de l'innovation (comparativement à des innovations équivalentes existantes ou des innovations alternatives) ?

- Oui  Non prévue
- Non  Sans objet
- En cours d'évaluation

Commentaire

\* 20. Disposez-vous de données portant sur les ressources financières et humaines nécessaires pour mettre à l'échelle l'innovation ?

Oui

Non prévue

Non

Sans objet

En cours d'évaluation

Commentaire

Questionnaire auto-administré sur l'évaluation du potentiel de mise à l'échelle

8. Rétroaction

\* 21. Souhaiteriez-vous avoir une rétroaction sur le présent sondage que vous venez de remplir ?

Oui

Non

22. Si oui, quel est le nom de l'équipe de recherche ?

23. Si oui, quel est le nom de la personne correspondante ?

24. Si oui, quelle est l'adresse courriel de correspondance ?
